# Supplementary material for: The protective effect of PFTα on alcohol-induced osteonecrosis of the femoral head
Source: PubMed Central journal article supplement (PMC5725055; doi:10.18632/oncotarget.19160), 2017-07-11
Supplement: oncotarget-08-100691-s001.pdf [file oncotarget-08-100691-s001.pdf]

# The protective effect of PFT $\alpha$ on alcohol-induced osteonecrosis of the femoral head

## SUPPLEMENTARY MATERIALS

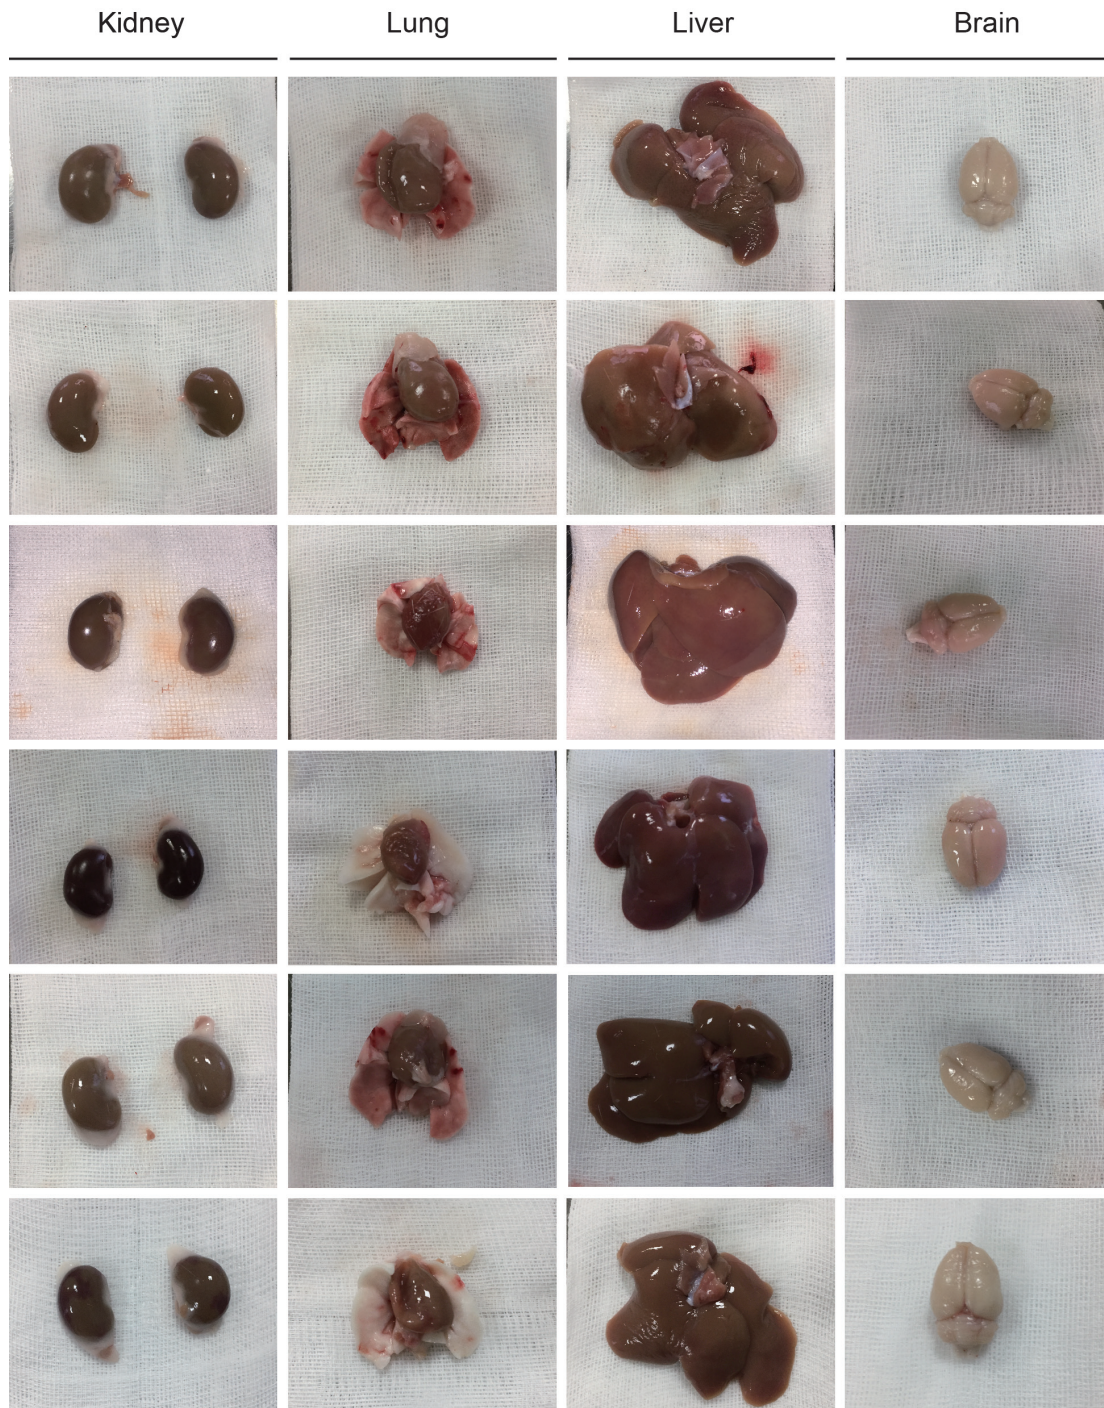

**Supplementary Figure 1: General assessment of organs from the PFT $\alpha$ -treated rats.** Six out of twenty rats were randomly chosen from PFT $\alpha$ -treated group. The brain, lungs, liver and kidneys were harvested and examined. No sign of tumorigenesis was observed.
